# Supplementary material for: Dynamics of the efficient cyclometalation of the undercoordinated organoplatinum complex [Pt(COD)(neoPh)]+ (neoPh = 2-methyl-2-phenylpropyl)
Source: Royal Society of Chemistry journal article supplement (doi:10.1039/d0nj04811a), 2020-01-01
Supplement: d0nj04811a1.pdf [file d0nj04811a1.pdf]

## Electronic Supporting Information (ESI+)

### Dynamics of the efficient cyclometalation of the undercoordinated organoplatinum complex [Pt(COD)(neoPh)]<sup>+</sup> (neoPh = 2-methyl-2-phenylpropyl).

Michael Neugebauer,<sup>a</sup> Simon Schmitz,<sup>a</sup> Dana Brünink,<sup>b</sup> Nikos Doltsinis,<sup>\*b</sup> Axel Klein <sup>\*a</sup>

contents:

- Fig. S1. 400 MHz <sup>1</sup>H NMR spectrum of the rearranged product [Pt(COD)(η<sup>2</sup>-neoPh)] acetone-d<sup>6</sup>.
- Fig. S2. 300 MHz <sup>195</sup>Pt/<sup>1</sup>H HMBC spectrum of [Pt(COD)(η<sup>2</sup>-neoPh)] in acetone-d<sup>6</sup>.
- Fig. S3. View on the crystal structure of [Pt(COD)(η<sup>2</sup>-neoPh)] along the crystallographic *a* axis.
- Fig. S4. View on the crystal structure of [Pt(COD)(η<sup>2</sup>-neoPh)] along the crystallographic *b* axis.
- Fig. S5. C–H⋯π type intermolecular interaction in the crystal structure of [Pt(COD)(η<sup>2</sup>-neoPh)].
- Fig. S6. Optimised ground state geometry of [Pt(COD)(neoPh)Cl] obtained by DFT calculations.
- Fig. S7. Optimised ground state geometry of [Pt(COD)(neoPh)]<sup>+</sup> obtained by DFT calculations.
- Fig. S8. Optimised ground state geometry of [Pt(COD)(η<sup>2</sup>-neoPh)] obtained by DFT calculations.
- Fig. S9. Snapshot along the MD trajectory at *n<sub>H</sub>* = 0.46 which corresponds to a C–H bond length of 1.45 Å and a C–Pt bond length of 2.11 Å.
- Fig. S10. Relation between the coordination number *n<sub>H</sub>* and the C–H distance.
- Table S1. Results of the structure refinement for [Pt(COD)(η<sup>2</sup>-neoPh)].
- Table S2. Selected structural data of doubly cyclometalated complexes.

## References

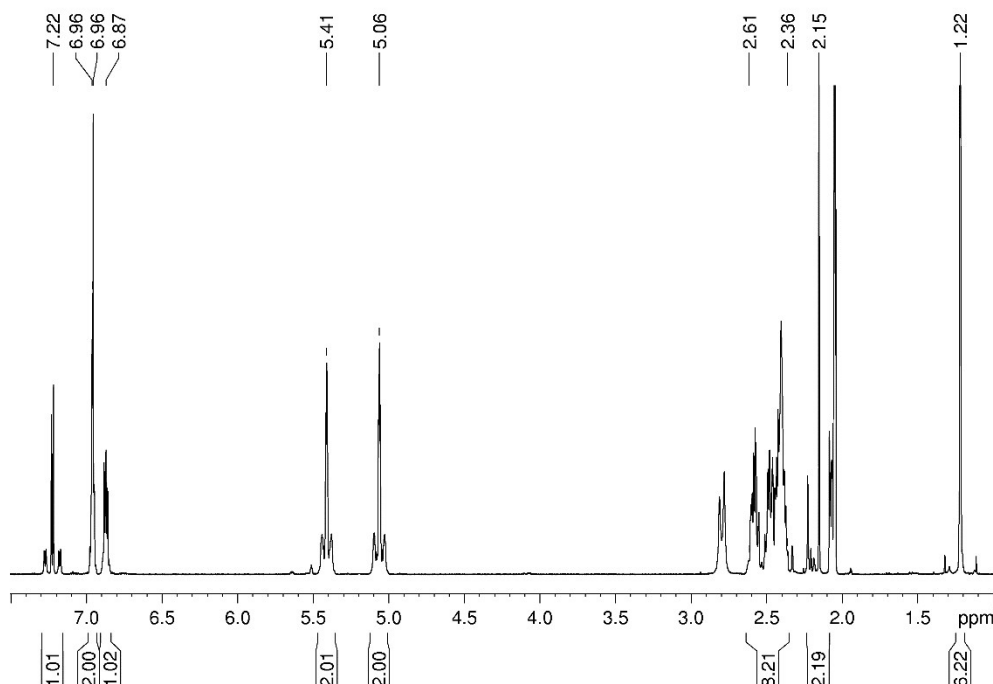

Fig. S1. 400 MHz <sup>1</sup>H NMR spectrum of the rearranged product [Pt(COD)(η<sup>2</sup>-neoPh)] acetone-d<sup>6</sup>.

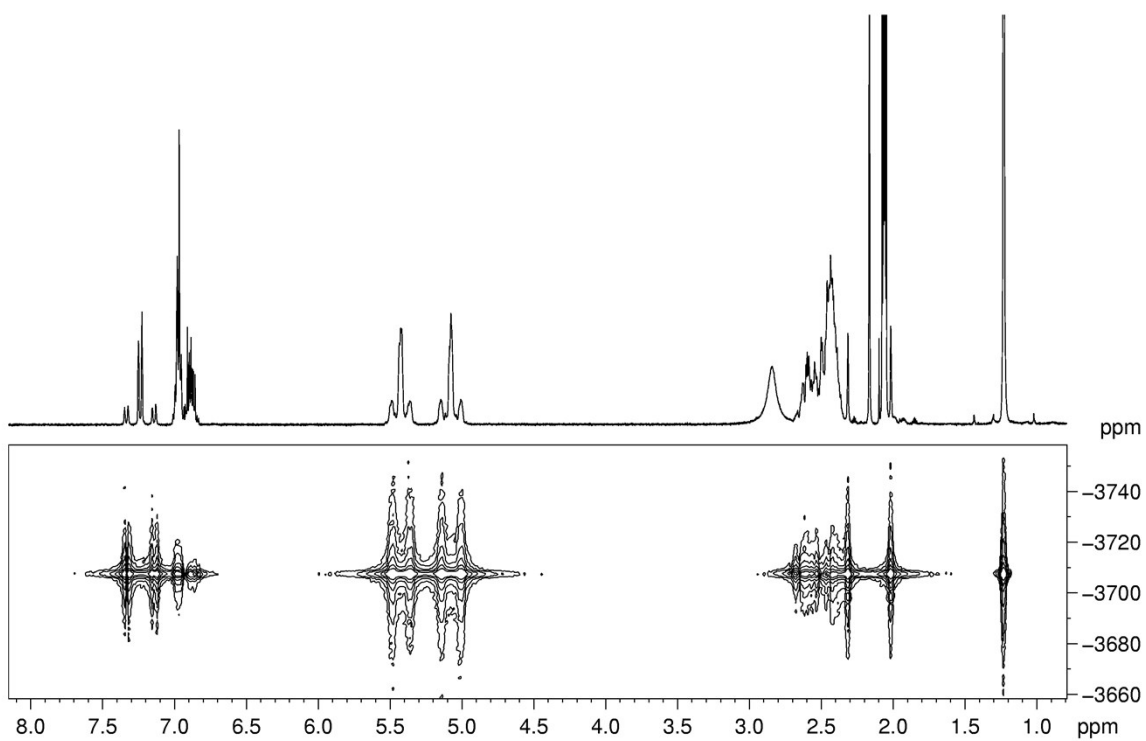

Fig. S2. 300 MHz  $^{195}\text{Pt}^1\text{H}$  HMBC spectrum of  $[\text{Pt}(\text{COD})(\eta^2\text{-neoPh})]$  in acetone- $\text{d}_6$ .

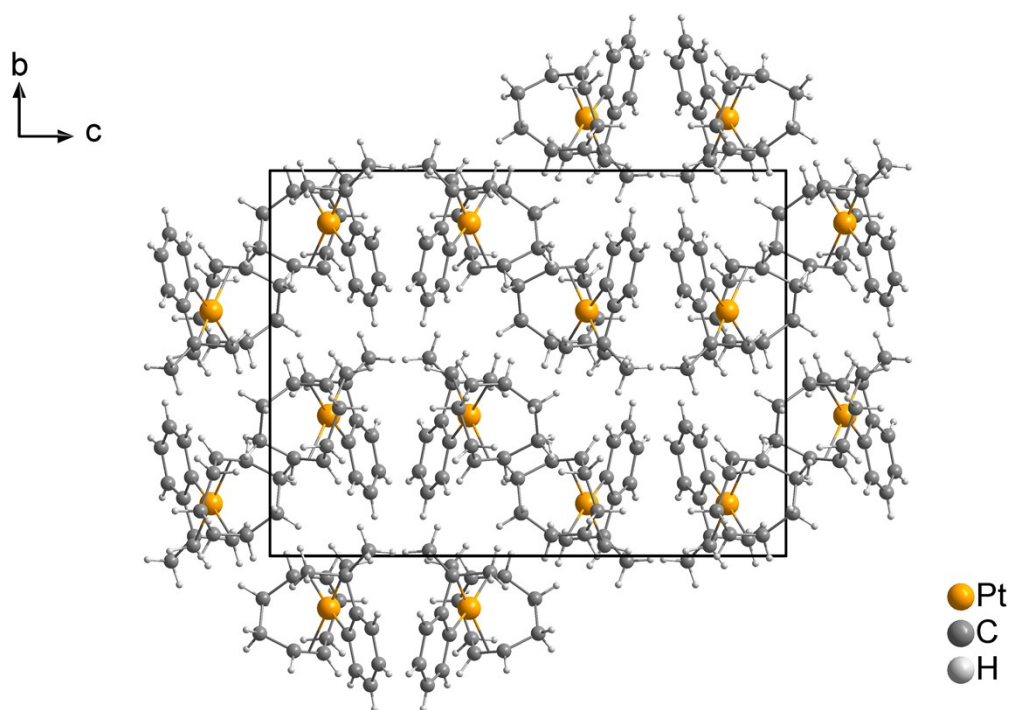

Fig. S3. View on the crystal structure of  $[\text{Pt}(\text{COD})(\eta^2\text{-neoPh})]$  along the crystallographic  $a$  axis.

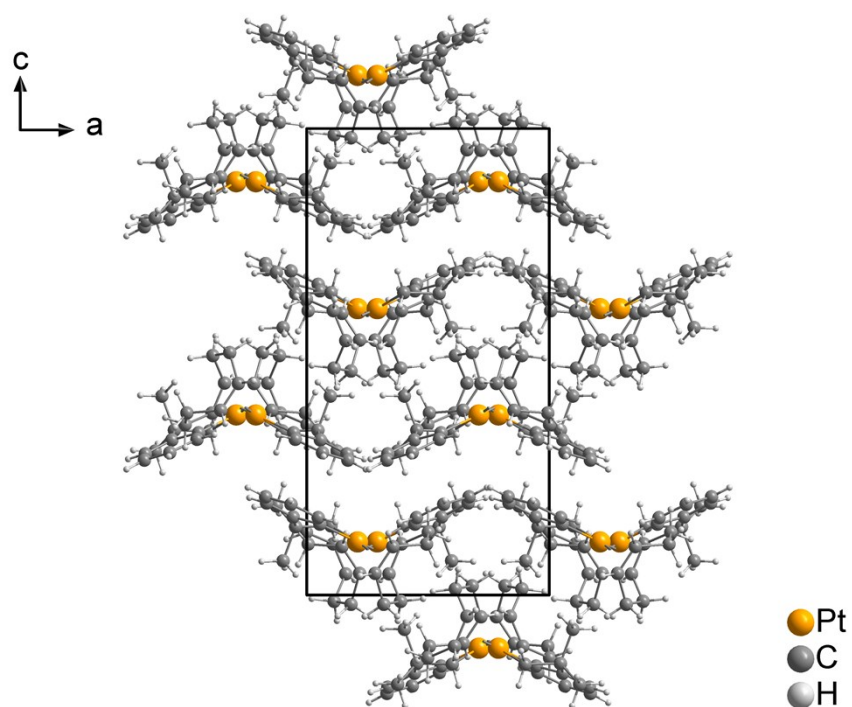

Fig. S4. View on the crystal structure of [Pt(COD)( $\eta^2$ -neoPh)] along the crystallographic *b* axis.

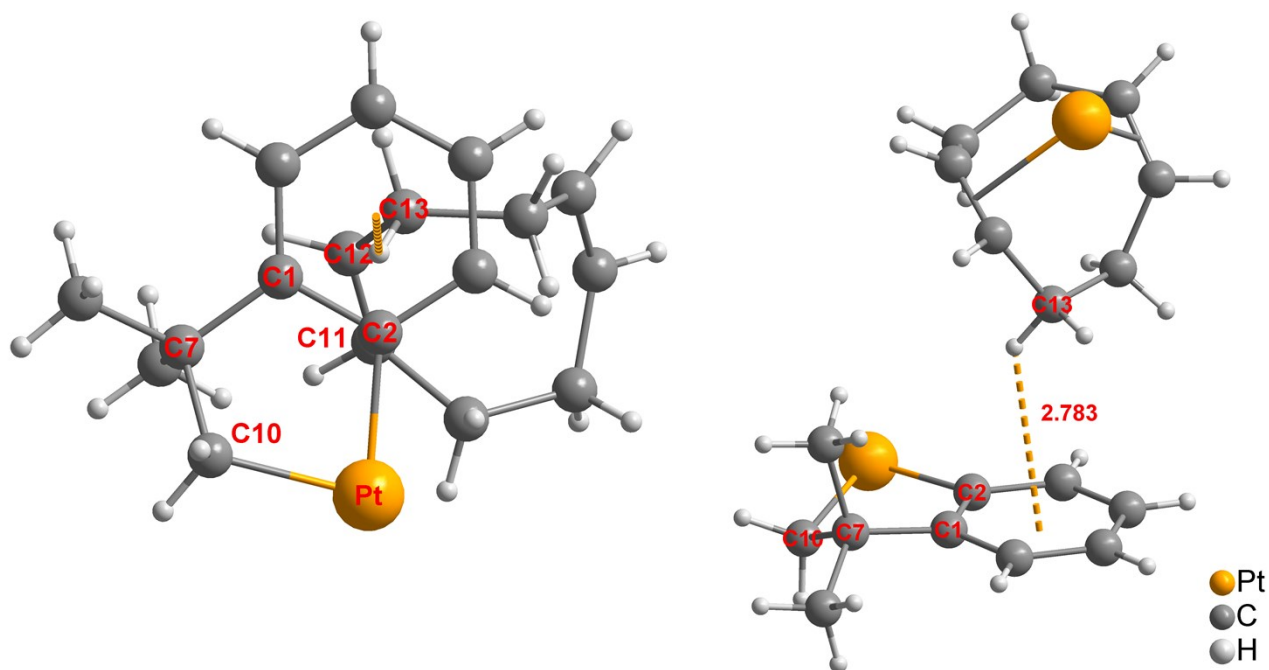

Fig. S5. C-H $\cdots$  $\pi$  type intermolecular interaction in the crystal structure of [Pt(COD)( $\eta^2$ -neoPh)]. Top view (left) and total view (right).

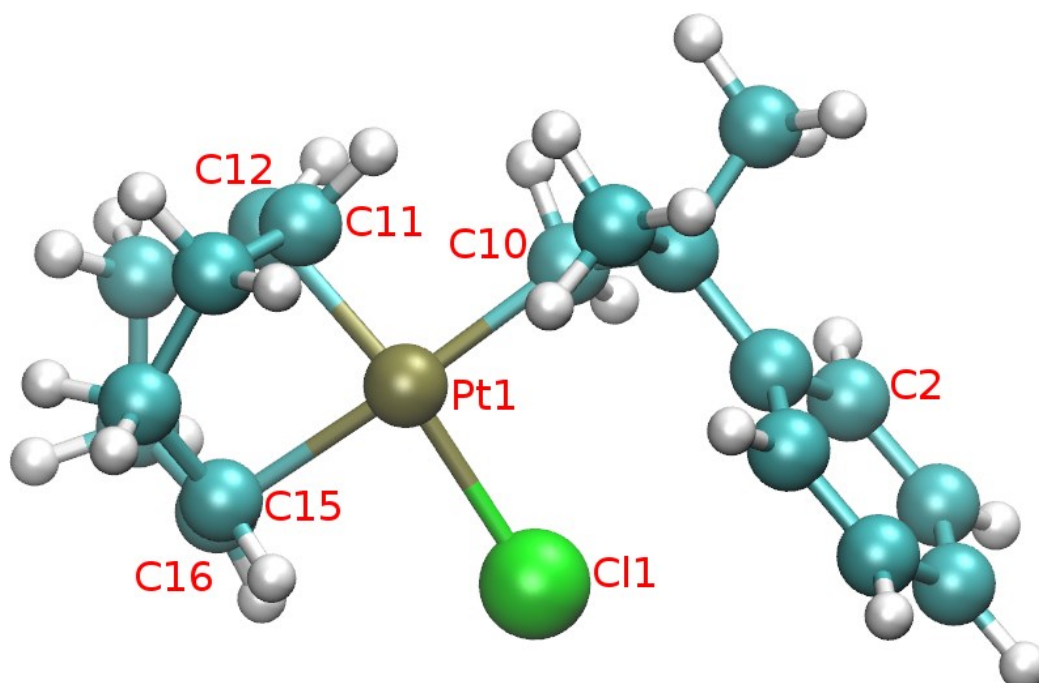

**Fig. S6.** Optimised ground state geometry of [Pt(COD)(neoPh)Cl] obtained by DFT calculations using the PBE0 functional and the SDD basis set.

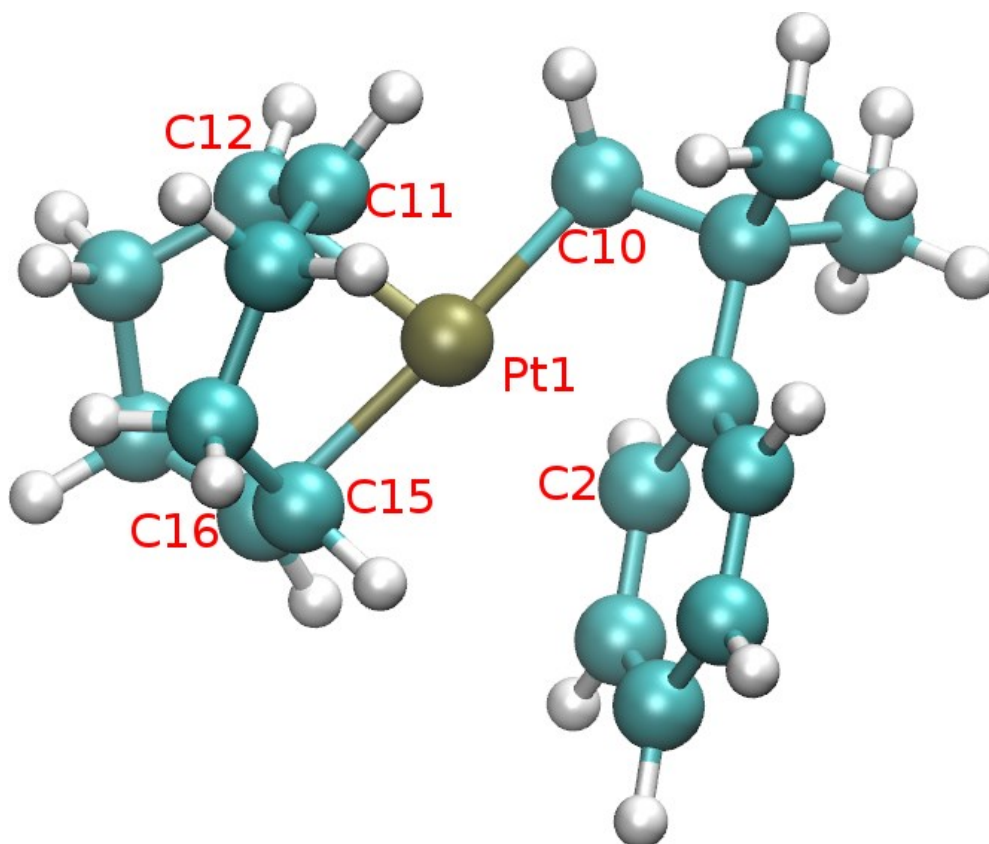

**Fig. S7.** Optimised ground state geometry of [Pt(COD)(neoPh)]<sup>+</sup> obtained by DFT calculations using the PBE0 functional and the SDD basis set.

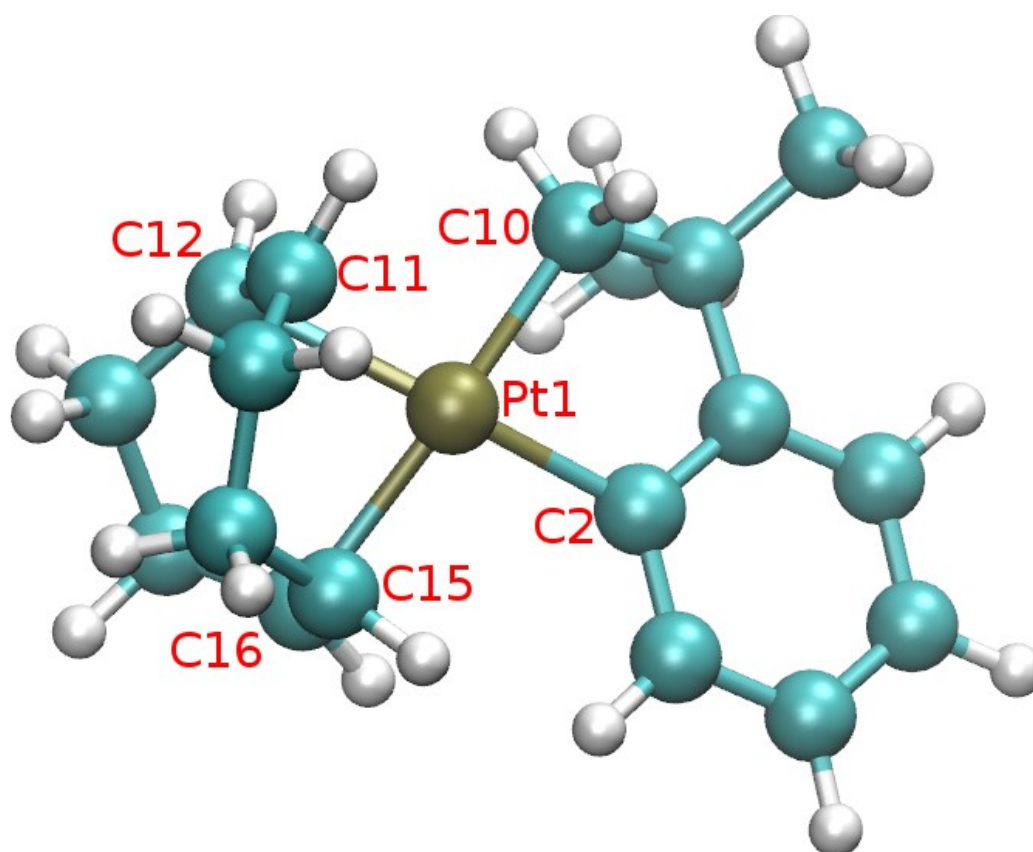

**Fig. S8.** Optimised ground state geometry of [Pt(COD)( $\eta^2$ -neoPh)] obtained by DFT calculations using the PBE0 functional and the SDD basis set.

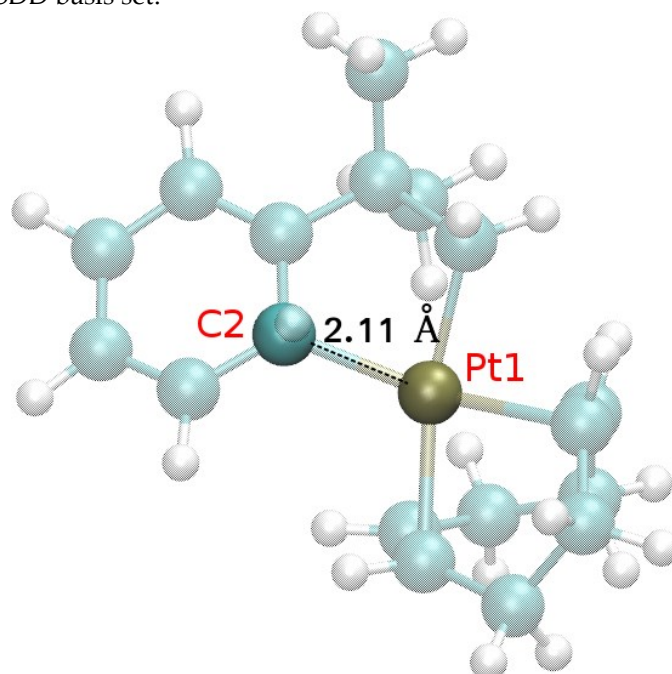

**Fig. S9.** Snapshot along the MD trajectory at  $n_H = 0.46$  which corresponds to a C-H bond length of 1.45 Å and a C-Pt bond length of 2.11 Å.

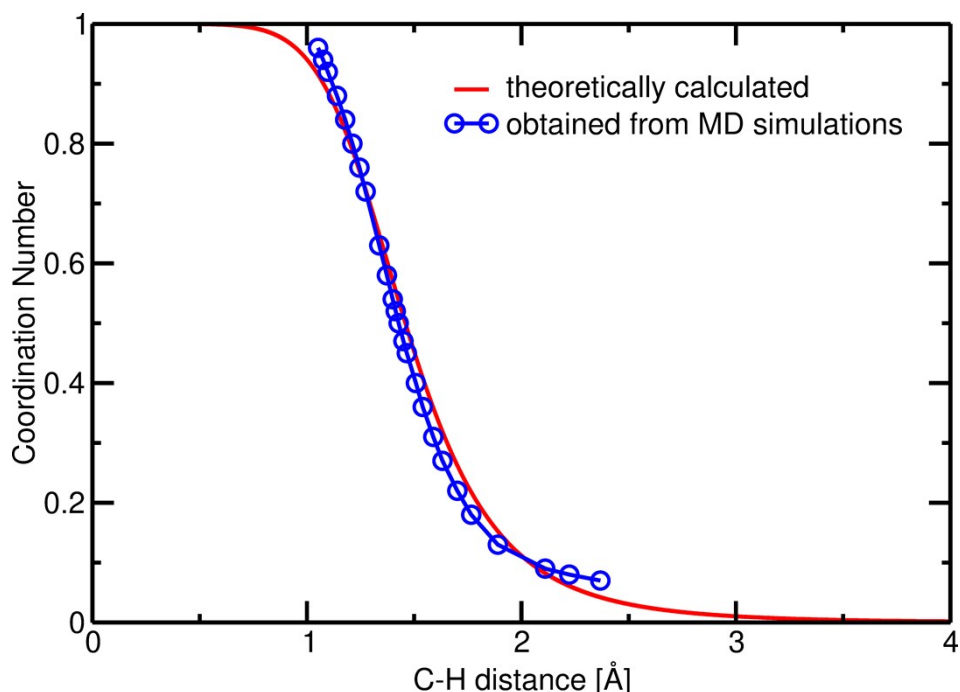

**Fig. S10.** Relation between the coordination number  $n_H$  and the C–H distance. Red line: Calculated using the formula implemented in CP2K (see Experimental Section 4.3) with only one H atom. Blue line: Values obtained from the MD simulations taking into account all H atoms.

**Table S1.** Results of the structure refinement for  $[\text{Pt}(\text{COD})(\kappa^2\text{-neoPh})]$  <sup>a</sup>

|                                         |                                                     |
|-----------------------------------------|-----------------------------------------------------|
| empirical formula                       | $\text{C}_{18}\text{H}_{24}\text{Pt}$               |
| formula mass g/mol                      | 435.46                                              |
| crystal system                          | orthorhombic                                        |
| space group                             | $Pbca$                                              |
| cell                                    | $a = 10.2621(9) \text{ \AA}$                        |
|                                         | $b = 14.7321(12) \text{ \AA}$                       |
|                                         | $c = 19.7363(18) \text{ \AA}$                       |
| volume / Z                              | $2984.0(4) \text{ \AA}^3 / 8$                       |
| calc. density $\text{Mg/m}^3$           | 1.939                                               |
| absorption coefficient $\text{mm}^{-1}$ | 9.389                                               |
| F(000)                                  | 1680                                                |
| crystal / colour                        | $0.3 \times 0.2 \times 0.1 \text{ mm}$ / colourless |
| T / wavelength                          | $170(2) \text{ K} / 0.71073 \text{ \AA}$            |
| $\theta$ -range                         | 2.06 to $27.42^\circ$                               |
| indices                                 | $-13 < h < 13, -18 < k < 18, -25 < l < 25$          |
| refl. measured / independent            | 32629 / 3333                                        |
| $R_{\text{int}}$                        | 0.0796                                              |
| Completeness of to $\theta$ range       | to $\theta = 25.242^\circ$ : 100%                   |
| data / restraints / parameters          | 3333 / 0 / 173                                      |
| goodness-of-Fit on $F^2$                | 1.024                                               |
| final R values [ $I > 2\sigma(I)$ ]     | $R_1 = 0.0384, wR_2 = 0.0979$                       |
| R values (all data)                     | $R_1 = 0.0511, wR_2 = 0.1038$                       |
| largest diff. p. a.                     | $1.933$ and $-1.619 \text{ e \AA}^{-3}$             |
| CCDC                                    | 1859573                                             |

<sup>a</sup> Refinements: Full matrix least-squares on  $F^2$ .

**Table S2.** Selected structural data of doubly cyclometalated Pt(II) complexes

|                                   | [Pt(COD)<br>( $\kappa^2$ -<br>neoPh)] | [Pd(COD)<br>( $\kappa^2$ -<br>neoPh)]                     | [Pt(COD)<br>(bph)]                                       | [Pt(phen<br>Me <sub>4</sub> )( $\kappa^2$ -<br>neoPh)]<br>•CH <sub>2</sub> Cl <sub>2</sub> <sup>b</sup> | [Pt(PyM<br>A-2-<br>OH)( $\kappa^2$ -<br>neoPh)] <sup>c</sup> | [Pt(PyM<br>AH-2-<br>OH)( $\kappa^2$ -<br>neoPh)] <sup>c</sup> | [Pt(PyM<br>AH-4-<br>OH)( $\kappa^2$ -<br>neoPh)] <sup>c</sup> | [Pt(Xyl-<br>DAB)( $\kappa^2$ -<br>neoPh)] <sup>d</sup> | [Pt(PPh <sub>3</sub> ) <sub>2</sub><br>(CH <sub>2</sub> ) <sub>4</sub> ] | [Pt(PPh <sub>2</sub> -<br>Ph-<br>CH=NBN)<br>(CH <sub>2</sub> ) <sub>4</sub> ] |
|-----------------------------------|---------------------------------------|-----------------------------------------------------------|----------------------------------------------------------|---------------------------------------------------------------------------------------------------------|--------------------------------------------------------------|---------------------------------------------------------------|---------------------------------------------------------------|--------------------------------------------------------|--------------------------------------------------------------------------|-------------------------------------------------------------------------------|
| reference                         | This work                             | Campora et al. <i>Inorg. Chem.</i> 2001, <b>40</b> , 4116 | Chen et al. <i>J. Chem. Cryst.</i> 1996, <b>26</b> , 527 | Puddephatt et al. <i>Organometallics</i> 2018, <b>37</b> , 3368                                         | Puddephatt et al. <i>Eur. J. Chem.</i> 2019, 2899            | Puddephatt et al. <i>Eur. J. Chem.</i> 2019, 2899             | Puddephatt et al. <i>Eur. J. Chem.</i> 2019, 2899             | Dahlenburg et al. <i>CDS Comm.</i> 1999                | Biefeld et al. <i>Inorg. Chem.</i> 1973, <b>12</b> , 2166.               | Lammertsma et al. <i>Dalton Trans.</i> 2014, <b>43</b> , 5546                 |
| CCDC                              | 1859573                               | 169528                                                    | 1276686                                                  | 1849222                                                                                                 | 1913418                                                      | 1913416                                                       | 1913417                                                       | 104847                                                 | 1275579                                                                  | 973798                                                                        |
| bonds lengths (Å)                 |                                       |                                                           |                                                          |                                                                                                         |                                                              |                                                               |                                                               |                                                        |                                                                          |                                                                               |
| C2-Pt                             | 2.030(6)                              | 2.023(3)                                                  | 2.01(3)                                                  | 1.98(1)                                                                                                 | 1.994(5)                                                     | 1.995(1)                                                      | 1.984(5)                                                      | 2.01(1)                                                | 2.053(2)                                                                 | 2.052(6)                                                                      |
| C10-Pt                            | 2.070(7)                              | 2.030(3)                                                  | 2.02(3)                                                  | 2.02(1)                                                                                                 | 2.034(6)                                                     | 2.022(1)                                                      | 2.036(6)                                                      | 2.04(1)                                                | 2.117(2)                                                                 | 2.149(6)                                                                      |
| Y1-Pt <sup>a</sup>                | 2.1155(3)                             | 2.2310(6)                                                 | 2.118(2)                                                 | 2.099(9)                                                                                                | 2.110(5)                                                     | 2.105(1)                                                      | 2.097(5)                                                      | 2.08(1)                                                | 2.279(2)                                                                 | 2.244(1)                                                                      |
| Y2-Pt <sup>a</sup>                | 2.1566(3)                             | 2.1933(6)                                                 | 2.149(2)                                                 | 2.130(8)                                                                                                | 2.124(4)                                                     | 2.207(1)                                                      | 2.205(5)                                                      | 2.11(1)                                                | 2.284(2)                                                                 | 2.117(5)                                                                      |
| C1-C2                             | 1.419(9)                              | 1.405(4)                                                  | 1.36(3)                                                  | 1.41(2)                                                                                                 | 1.417(7)                                                     | 1.421(2)                                                      | 1.424(7)                                                      | 1.37(2)                                                | 1.480(1)                                                                 | 1.831(8)                                                                      |
| C1-C7                             | 1.513(8)                              | 1.500(4)                                                  | 1.41(4)                                                  | 1.50(2)                                                                                                 | 1.510(8)                                                     | 1.516(2)                                                      | 1.506(8)                                                      | 1.50(2)                                                | 1.458(2)                                                                 | 1.414(6)                                                                      |
| C7-C10                            | 1.539(9)                              | 1.527(4)                                                  | 1.47(4)                                                  | 1.58(2)                                                                                                 | 1.543(9)                                                     | 1.543(2)                                                      | 1.555(7)                                                      | 1.53(2)                                                | 1.570(2)                                                                 | 1.468(9)                                                                      |
| C7-C8                             | 1.542(9)                              | 1.532(5)                                                  |                                                          | 1.52(2)                                                                                                 | 1.535(8)                                                     | 1.535(2)                                                      | 1.52(1)                                                       | 1.52(3)                                                |                                                                          | 1.281(9)                                                                      |
| angles (°)                        |                                       |                                                           |                                                          |                                                                                                         |                                                              |                                                               |                                                               |                                                        |                                                                          |                                                                               |
| COD-bite<br>Y1-Pt-Y2 <sup>a</sup> | 85.7(1)                               | 83.2(1)                                                   | 85.03(6)                                                 | 78.1(4)                                                                                                 | 77.3(1)                                                      | 78.04(5)                                                      | 79.6(2)                                                       | 76.0(4)                                                | 98.80(4)                                                                 | 88.2(1)                                                                       |
|                                   |                                       |                                                           |                                                          | N1-Pt-N2                                                                                                | N1-Pt-N2                                                     | N1-Pt-NH                                                      | N1-Pt-NH                                                      | N1-Pt-N2                                               | P1-Pt-P2                                                                 | P-Pt-N                                                                        |
| neoPh-bite<br>C2-Pt-C10           | 80.5(3)                               | 79.1(1)                                                   | 79(1) bph                                                | 80.5(5)                                                                                                 | 80.1(2)                                                      | 81.28(5)                                                      | 80.6(3)                                                       | 80.0(5)                                                | 81.04(4)                                                                 | 84.6(2)                                                                       |
|                                   |                                       |                                                           |                                                          |                                                                                                         |                                                              |                                                               |                                                               |                                                        | C <sub>4</sub> H <sub>8</sub>                                            | C <sub>4</sub> H <sub>8</sub>                                                 |
| Y1-Pt-C2 <sup>a</sup>             | 175.4(2)                              | 175.40(9)                                                 | 98.1(8)                                                  | 176.3(4)                                                                                                | 173.3(2)                                                     | 174.9(1)                                                      | 173.2(2)                                                      | 105.5(4)                                               | 93.74(5)                                                                 | 94.9(2)                                                                       |
|                                   |                                       |                                                           |                                                          |                                                                                                         | N1-Pt-C2                                                     | N1-Pt-C2                                                      | N1-Pt-C2                                                      | N2-Pt-C2                                               | P1-Pt-C1                                                                 | P1-Pt-C4                                                                      |
| Y1-Pt-C10 <sup>a</sup>            | 94.9(3)                               | 96.42(9)                                                  | 177.3(7)                                                 | 98.0(4)                                                                                                 | 99.7(2)                                                      | 96.5(1)                                                       | 98.7(2)                                                       | 173.5(5)                                               | 173.39(5)                                                                | 176.8(1)                                                                      |
|                                   |                                       |                                                           |                                                          |                                                                                                         | N1-Pt-C10                                                    | N1-Pt-C10                                                     | N1-Pt-C10                                                     | N2-Pt-C10                                              | P1-Pt-C4                                                                 | P1-Pt-C1                                                                      |
| Y2-Pt-C2 <sup>a</sup>             | 98.8(2)                               | 101.26(9)                                                 | 176.4(8)                                                 | 103.6(4)                                                                                                | 103.0(1)                                                     | 103.9(1)                                                      | 101.2(2)                                                      | 174.94(42)                                             | 167.36(6)                                                                | 176.77(22)                                                                    |
|                                   |                                       |                                                           |                                                          |                                                                                                         | N2-Pt-C2                                                     | NH-Pt-C2                                                      | NH-Pt-C2                                                      | N1-Pt-C2                                               | P2-Pt-C1                                                                 | N1-Pt-C4                                                                      |
| Y2-Pt-C10 <sup>a</sup>            | 177.9(2)                              | 178.93(9)                                                 | 97.6(7)                                                  | 172.9(4)                                                                                                | 176.3(2)                                                     | 174.5(1)                                                      | 176.6(2)                                                      | 98.76(50)                                              | 86.56(4)                                                                 | 92.17(23)                                                                     |
|                                   |                                       |                                                           |                                                          |                                                                                                         | N2-Pt-C10                                                    | NH-Pt-C10                                                     | NH-Pt-C10                                                     | N1-Pt-C10                                              | P2-Pt-C4                                                                 | N1-Pt-C1                                                                      |
| Pt-C2-C1                          | 115.2(4)                              | 115.6(2)                                                  | 117(2)                                                   | 116.2(8)                                                                                                | 115.9(3)                                                     | 116.2(1)                                                      | 116.6(4)                                                      | 116.7(8)                                               | 115.94(6)                                                                | 104.16(35)                                                                    |
|                                   |                                       |                                                           |                                                          |                                                                                                         |                                                              |                                                               |                                                               |                                                        | Pt-C1-C2                                                                 | Pt-C1-C2                                                                      |
| Pt-C10-C7                         | 110.0(4)                              | 112.0(2)                                                  | 116(2)                                                   | 109.4(8)                                                                                                | 111.3(4)                                                     | 112.5(1)                                                      | 111.4(4)                                                      | 111.0(9)                                               | 104.55(6)                                                                | 110.99(41)                                                                    |
|                                   |                                       |                                                           |                                                          |                                                                                                         |                                                              |                                                               |                                                               |                                                        | Pt-C3-C4                                                                 | Pt-C4-C3                                                                      |
| C2-C1-C7                          | 115.3(5)                              | 115.3(3)                                                  | 114(2)                                                   | 115.1(9)                                                                                                | 115.2(5)                                                     | 114.9(1)                                                      | 114.7(5)                                                      | 115(1)                                                 | 107.18(7)                                                                | 106.35(37)                                                                    |
|                                   |                                       |                                                           |                                                          |                                                                                                         |                                                              |                                                               |                                                               |                                                        | C1-C2-C3                                                                 | C4-C3-C2                                                                      |
| C1-C7-C10                         | 106.4(5)                              | 104.7(2)                                                  | 112(2)                                                   | 105.0(9)                                                                                                | 104.9(5)                                                     | 105.9(1)                                                      | 105.0(4)                                                      | 106(1)                                                 | 110.58(8)                                                                | 110.13(50)                                                                    |
|                                   |                                       |                                                           |                                                          |                                                                                                         |                                                              |                                                               |                                                               |                                                        | C2-C3-C4                                                                 | C3-C2-C1                                                                      |
| C1-C7-C8                          | 108.1(5)                              | 108.1(3)                                                  | -                                                        | 109.6(9)                                                                                                | 108.7(5)                                                     | 108.4(1)                                                      | 109.2(5)                                                      | 109(1)                                                 | -                                                                        | -                                                                             |
| C-C-C-C<br>torsion                | 28.6(7)                               | 27.2(2)                                                   | 2.3(33)                                                  | 24.7(9)                                                                                                 | 25.8(6)                                                      | 25.4(1)                                                       | 28.1(7)                                                       | 25.4(16)                                               | 47.6(1)                                                                  | 54.1(6)                                                                       |
| Ph /<br>coord.<br>plane           | ~15                                   | ~16                                                       | ~4                                                       | ~25.5                                                                                                   | ~20.7                                                        | ~13.9                                                         | ~20.3                                                         | ~18                                                    | -                                                                        | ~45                                                                           |

<sup>a</sup> For the COD ligand, Y1: Centroid C11=C12 and Y2: Centroid C15=C16. <sup>b</sup> PhenMe<sub>4</sub> = 3,4,7,8-tetramethyl-1,10-phenanthroline. <sup>c</sup> PyMA-2-OH =  $\kappa^2$ -N,N'-2-C<sub>5</sub>H<sub>4</sub>NCH=N-2-C<sub>6</sub>H<sub>4</sub>OH, PyMAH-2-OH = ( $\kappa^2$ -N,N'-2-C<sub>5</sub>H<sub>4</sub>NCH-NH-2-C<sub>6</sub>H<sub>4</sub>OH, PyMAH-4-OH = ( $\kappa^2$ -N,N'-2-C<sub>5</sub>H<sub>4</sub>NCH-NH-4-C<sub>6</sub>H<sub>4</sub>OH). <sup>d</sup> Xyl-DAB = N,N-bis(2,6-dimethylphenyl)-1,4-diazabuta-1,3-diene.

## References

- J. Campora, J. A. Lopez, P. Palma, D. del Rio, and E. Carmona, Synthesis and Insertion Reactions of the Cyclometalated Palladium-Alkyl Complexes  $\text{Pd}(\text{CH}_2\text{CMe}_2\text{-o-C}_6\text{H}_4)_2$ . Observation of a Pentacoordinated Intermediate in the Insertion of  $\text{SO}_2$ , *Inorg. Chem.* 2001, **40**, 4116–4126.
- Y. Chen, C. Woods, M. W. Perkovic, and D. P. Rillema, Crystal structure, physical and photophysical properties of a platinum(II) complex coordinated to the biphenyl dianion and cyclooctadiene, *J. Chem. Cryst.* 1996, **26**, 527–531.
- M. A. Fard, A. Behnia and R. J. Puddephatt, Cycloneophylplatinum Chemistry: A New Route to Platinum(II) Complexes and the Mechanism and Selectivity of Protonolysis of Platinum–Carbon Bonds, *Organometallics* 2018, **37**, 3368–3377.
- A. Behnia, M. A. Fard, P. D. Boyle and R. J. Puddephatt, Complexes Containing a Phenol–Platinum(II) Hydrogen Bond: Synthons for Supramolecular Self-Assembly and Precursors for Hydridoplatinum(IV) Complexes, *Eur. J. Inorg. Chem.* 2019, **2019**, 2899–2906.
- L. Dahlenburg, C. Becker, J. Hock, S. Kohlbrandt CDS Comm. 1999.
- C. Biefeld, H. A. Eick, and R. H. Grubbs, Crystal Structure of Bis(triphenylphosphine)tetramethyleneplatinum(II), *Inorg. Chem.* 1973, **12**, 2166–2170.
- T. Mahamo, J. R. Moss, S. F. Mapolie, G. S. Smith, J. C. Sloopweg, and K. Lammertsma, Platinacycloalkane complexes containing [P,N] bidentate ligands: synthesis and decomposition studies, *DaltonTrans.* 2014, **43**, 5546–5557.
